# Supplementary material
Source: PubMed Central journal article supplement (PMC4656193)

**A**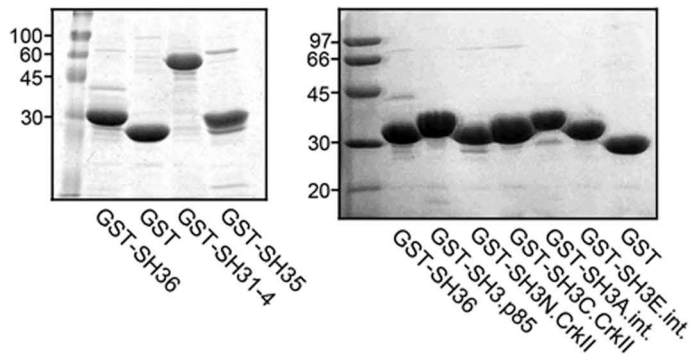**B (i)**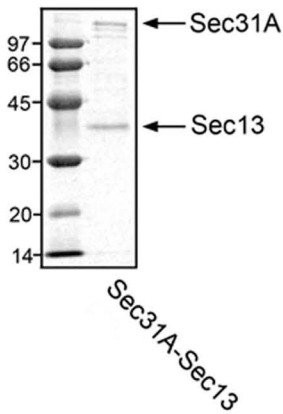**(ii)**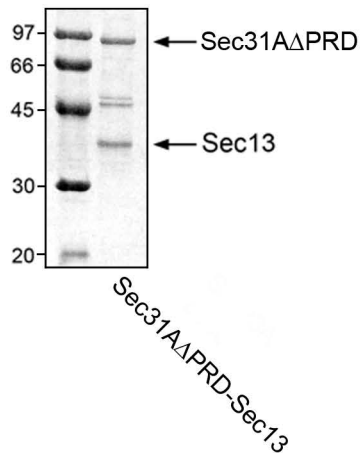**C (i)**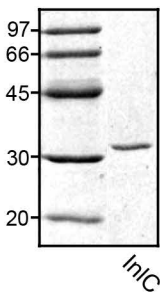**(ii)**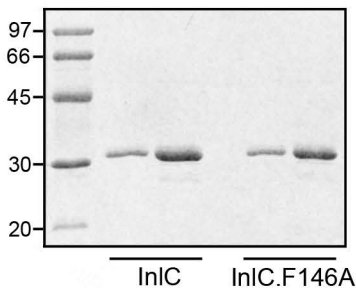

**A**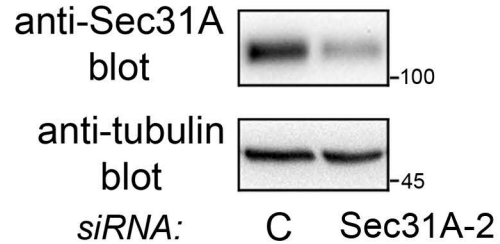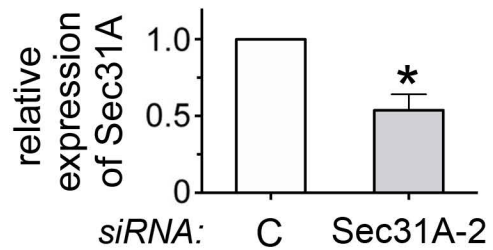**B**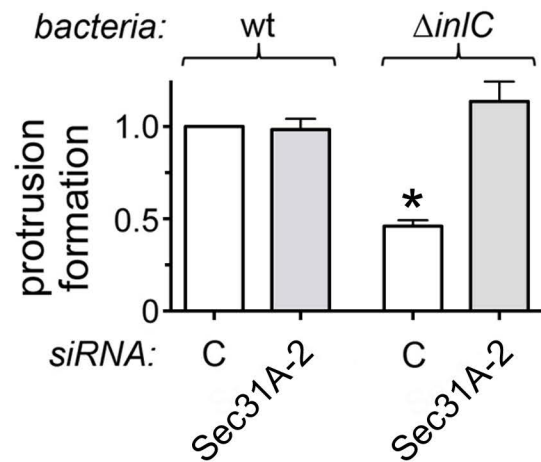**C**

(i)

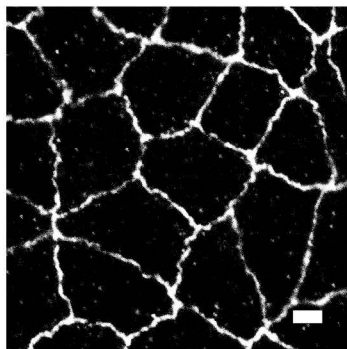

C

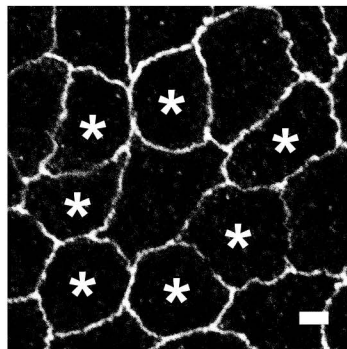

Sec31A-2

(ii)

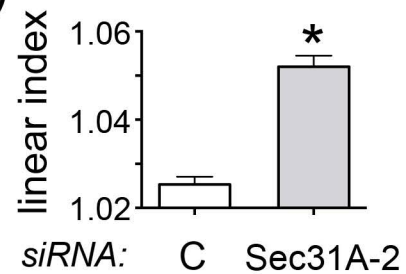

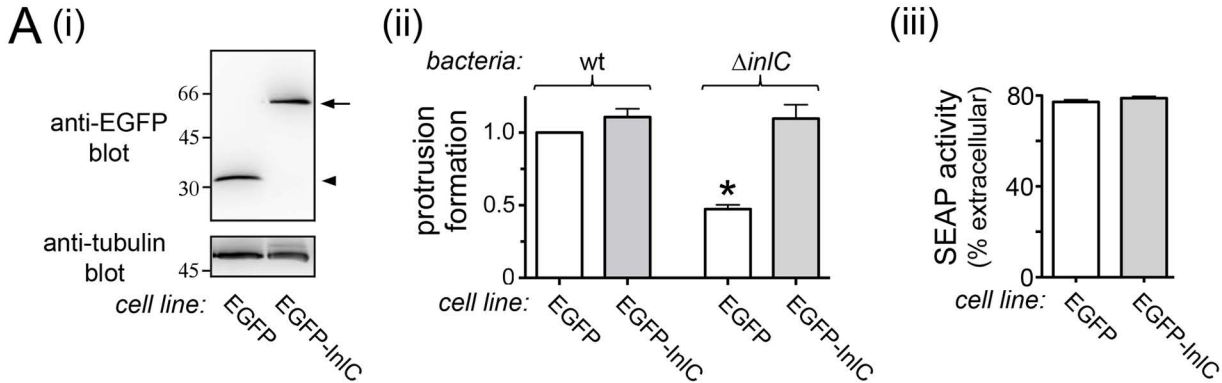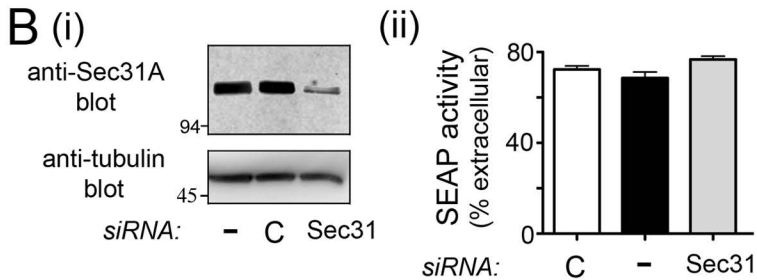

Supplement: NIHMS733598-supplement-Supp_FigureS1-S3.pdf [file NIHMS733598-supplement-Supp_FigureS1-S3.pdf]
